# Supplementary material for: Adherence to Antipsychotics and Cardiometabolic Medication: Association With Health Care Utilization and Costs
Source: Atypon-hosted journal article supplement (doi:10.1176/appi.ps.201100328), 2012-06-17
Supplement: pss6309_0920_ds.pdf [file pss6309_0920_ds.pdf]

**Appendix 1:** Frequency of chronic comorbid conditions and antipsychotic treatment characteristics among Medicaid patients with schizophrenia

|                                   | Prevalent Schizophrenia by Year |       |             |       |             |       |             |       |             |       |
|-----------------------------------|---------------------------------|-------|-------------|-------|-------------|-------|-------------|-------|-------------|-------|
|                                   | 2004                            |       | 2005        |       | 2006        |       | 2007        |       | 2008        |       |
| Total (N)                         | N = 21,351                      |       | N = 21,594  |       | N = 20,723  |       | N = 16,910  |       | N = 17,263  |       |
| By Comorbidity <sup>a</sup>       | N                               | %     | N           | %     | N           | %     | N           | %     | N           | %     |
| No Comorbidity                    | 12,182                          | 57.1% | 11,866      | 55.0% | 10,894      | 52.6% | 8,242       | 48.7% | 8,262       | 47.9% |
| Diabetes                          | 3,995                           | 18.7% | 4,211       | 19.5% | 4,328       | 20.9% | 3,865       | 22.9% | 4,000       | 23.2% |
| Hyperlipidemia                    | 3,420                           | 16.0% | 3,882       | 18.0% | 4,257       | 20.5% | 4,072       | 24.1% | 4,223       | 24.5% |
| Hypertension                      | 6,508                           | 30.5% | 6,976       | 32.3% | 6,980       | 33.7% | 6,203       | 36.7% | 6,430       | 37.3% |
| Charlson Comorbidity Index (M±SD) | 0.85 ± 1.49                     |       | 0.89 ± 1.53 |       | 0.94 ± 1.58 |       | 1.06 ± 1.74 |       | 1.09 ± 1.77 |       |
| By Medication                     |                                 |       |             |       |             |       |             |       |             |       |
| Any Antipsychotic                 | 19,731                          | 92.4% | 19,851      | 91.9% | 18,848      | 91.0% | 15,349      | 90.8% | 15,692      | 90.9% |
| Aripiprazole                      | 3,529                           | 16.5% | 3,210       | 14.9% | 2,891       | 14.0% | 2,535       | 15.0% | 2,499       | 14.5% |
| Clozapine                         | 1,645                           | 7.7%  | 1,613       | 7.5%  | 1,500       | 7.2%  | 1,324       | 7.8%  | 1,265       | 7.3%  |
| Olanzapine                        | 6,727                           | 31.5% | 5,025       | 23.3% | 3,863       | 18.6% | 3,078       | 18.2% | 2,970       | 17.2% |
| Olanzapine/Fluoxetine             | 133                             | 0.6%  | 111         | 0.5%  | 67          | 0.3%  | 45          | 0.3%  | 27          | 0.2%  |
| Paliperidone                      | 0                               | 0%    | 0           | 0%    | 0           | 0%    | 757         | 4.5%  | 1,315       | 7.6%  |
| Quetiapine                        | 5,055                           | 23.7% | 5,453       | 25.3% | 5,031       | 24.3% | 4,167       | 24.6% | 4,318       | 25.0% |
| Risperidone                       | 7,891                           | 37.0% | 8,074       | 37.4% | 7,619       | 36.8% | 6,171       | 36.5% | 5,922       | 34.3% |

|                                       |             |       |             |       |             |       |             |       |             |       |
|---------------------------------------|-------------|-------|-------------|-------|-------------|-------|-------------|-------|-------------|-------|
| Ziprasidone                           | 2,586       | 12.1% | 2,803       | 13.0% | 2,689       | 13.0% | 2,198       | 13.0% | 2,181       | 12.6% |
| Typical Antipsychotic <sup>b</sup>    | 6,760       | 31.7% | 6,694       | 31.0% | 6,541       | 31.6% | 5,079       | 30.0% | 5,374       | 31.1% |
| Antipsychotic Fills Per Person (M±SD) | 14.8 ± 13.4 |       | 13.9 ± 12.6 |       | 13.2 ± 12.4 |       | 14.3 ± 13.3 |       | 14.3 ± 12.8 |       |

<sup>a</sup> Comorbidity frequencies do not sum to 100% because people may be counted in more than one metabolic comorbidity group

<sup>b</sup> Typical antipsychotics were excluded from analyses

**Appendix 2:** Descriptive statistics for pooled annual cross-sections (2004-2008) of patients with schizophrenia using antipsychotic medications

|                             | Antipsychotic Non-Adherent |        | Antipsychotic Adherent |      |
|-----------------------------|----------------------------|--------|------------------------|------|
|                             | N = 35,590                 |        | N = 51,425             |      |
| Eligible Population         | N                          | %      | N                      | %    |
| Average Age (M±SD)          | 41.0 ± 12.0**              |        | 44.2 ± 11.8            |      |
| Age 18-34                   | 11135                      | 31.3** | 11769                  | 22.9 |
| Age 35-54                   | 19524                      | 54.9** | 28579                  | 55.6 |
| Age 55+                     | 4931                       | 13.9** | 11077                  | 21.5 |
| Male                        | 18480                      | 51.9   | 26689                  | 51.9 |
| White Race                  | 11011                      | 30.9** | 24640                  | 47.9 |
| Black Race                  | 21408                      | 60.2** | 21947                  | 42.7 |
| Missing Race                | 3171                       | 8.9    | 4838                   | 9.4  |
| Enrolled in Capitated Plan  | 14493                      | 40.9** | 18034                  | 35.1 |
| MHSA Coverage               | 33930                      | 95.3** | 48683                  | 94.7 |
| Pre-period Psychotherapy    | 12311                      | 34.6   | 17673                  | 34.4 |
| Pre-period Psychiatrist Use | 8427                       | 23.7   | 12043                  | 23.4 |
| Charlson Index              |                            |        |                        |      |
| Charlson 0-1                | 20014                      | 56.2** | 27054                  | 52.6 |
| Charlson 1-2                | 8252                       | 23.2** | 13029                  | 25.3 |
| Charlson 2-3                | 3088                       | 8.7**  | 5139                   | 10.0 |
| Charlson 3+                 | 4236                       | 11.9** | 6203                   | 12.1 |
| Comorbid Diabetes           | 4,138                      | 11.6** | 8,211                  | 16.0 |
| Comorbid Hyperlipidemia     | 3,070                      | 8.6**  | 7,839                  | 15.2 |
| Comorbid Hypertension       | 9,233                      | 25.9** | 15,610                 | 30.4 |
| One Metabolic Condition     | 7,533                      | 21.2** | 13,415                 | 26.1 |
| Two Metabolic Conditions    | 3,188                      | 9.0    | 6,505                  | 12.7 |

|                               |                           |                    |             |      |
|-------------------------------|---------------------------|--------------------|-------------|------|
| Three Metabolic Conditions    | 844                       | 2.4 <sup>**</sup>  | 1,745       | 3.4  |
| Antipsychotic Used            |                           |                    |             |      |
| Aripiprazole                  | 6,152                     | 17.3 <sup>*</sup>  | 8,512       | 16.6 |
| Clozapine                     | 1,108                     | 3.1 <sup>**</sup>  | 6,239       | 12.1 |
| Olanzapine                    | 8,175                     | 23.0 <sup>**</sup> | 13,488      | 26.2 |
| Olanzapine/Fluoxetine         | 210                       | 0.6 <sup>**</sup>  | 173         | 0.3  |
| Paliperidone                  | 871                       | 2.5                | 1,201       | 2.3  |
| Quetiapine                    | 10,345                    | 29.1 <sup>**</sup> | 13,679      | 26.6 |
| Risperidone                   | 15,371                    | 43.2 <sup>**</sup> | 20,306      | 39.5 |
| Ziprasidone                   | 5,267                     | 14.8 <sup>*</sup>  | 7,190       | 14.0 |
| Antipsychotic Copay > \$0     | 19949                     | 56.1 <sup>**</sup> | 26526       | 51.6 |
| Comorbid Medication Adherence |                           |                    |             |      |
| Antidiabetic Drugs (M±SD)     | 61.8 ± 27.4 <sup>**</sup> |                    | 84.5 ± 21.5 |      |
| Antihyperlipidemics (M±SD)    | 58.9 ± 28.3 <sup>**</sup> |                    | 81.9 ± 22.9 |      |
| Antihypertensives (M±SD)      | 60.8 ± 28.6 <sup>**</sup> |                    | 84.4 ± 22.4 |      |

\* P < 0.01; \*\* P < 0.001; MHSA = Mental Health Substance Abuse Coverage in Medicaid Program  
Medication adherence measured by the proportion of days covered (PDC) and dichotomized at a PDC > 80% for antipsychotic adherence  
Among all antipsychotic users (Not restricted to antipsychotic users with comorbid cardiometabolic medication use).



**Appendix 3.** Adjusted annual healthcare utilization and cost differences between adherent and non-adherent antipsychotic users across each individual comorbid cardiometabolic medication cohort

| <b>Utilization and Cost Differences</b> <sup>a</sup>         | Anti-Diabetes<br>Medication Cohort<br>(N=12,349) |                               | Anti-Hypertensive<br>Cohort<br>(N=24,843) |                               | Statin<br>Cohort<br>(N=10,909) |                               |
|--------------------------------------------------------------|--------------------------------------------------|-------------------------------|-------------------------------------------|-------------------------------|--------------------------------|-------------------------------|
|                                                              | Value                                            | 95% CI                        | Value                                     | 95% CI                        | Value                          | 95% CI                        |
| <b>EMERGENCY ROOM</b>                                        |                                                  |                               |                                           |                               |                                |                               |
| Annual Odds of ER Use (OR)                                   | 0.34                                             | 0.30 - 0.39 <sup>***</sup>    | 0.30                                      | 0.28 - 0.34 <sup>***</sup>    | 0.38                           | 0.33 - 0.44 <sup>***</sup>    |
| ER Visits Per Person Per Year (number) <sup>b</sup>          | -0.32                                            | -0.39 to -0.24 <sup>***</sup> | -0.33                                     | -0.38 to -0.28 <sup>***</sup> | -0.30                          | -0.38 to -0.22 <sup>***</sup> |
| ER Expenditures Per Person Per Year (\$) <sup>b</sup>        | -531                                             | -660 to -403 <sup>***</sup>   | -574                                      | -661 to -487 <sup>***</sup>   | -480                           | -476 to -348 <sup>***</sup>   |
| <b>OUTPATIENT</b>                                            |                                                  |                               |                                           |                               |                                |                               |
| Outpatient Visits Per Person Per Year (number)               | 0.19                                             | 0.14 - 0.23 <sup>***</sup>    | 0.28                                      | 0.24 - 0.31 <sup>***</sup>    | 0.08                           | 0.02 - 0.15 <sup>*</sup>      |
| Outpatient Expenditure Per Person Per Year (\$)              | 1694                                             | 1266 - 2123 <sup>***</sup>    | 2415                                      | 2105 - 2724 <sup>***</sup>    | 792                            | 171 - 1414 <sup>*</sup>       |
| <b>INPATIENT</b>                                             |                                                  |                               |                                           |                               |                                |                               |
| Annual Odds of Inpatient Admission (OR)                      | 0.38                                             | 0.33 - 0.43 <sup>***</sup>    | 0.34                                      | 0.31 - 0.37 <sup>***</sup>    | 0.36                           | 0.30 - 0.42 <sup>***</sup>    |
| Inpatient Admissions Per Person Per Year <sup>c</sup>        | -0.21                                            | -0.29 to -0.12 <sup>***</sup> | -0.20                                     | -0.26 to -0.15 <sup>***</sup> | -0.20                          | -0.28 to -0.11 <sup>***</sup> |
| Inpatient Expenditures Per Person Per Year (\$) <sup>c</sup> | -5028                                            | -7136 to -2919 <sup>***</sup> | -5078                                     | -6459 to -3698 <sup>***</sup> | -4599                          | -6708 to -2491 <sup>***</sup> |
| <b>MEDICATION</b>                                            |                                                  |                               |                                           |                               |                                |                               |
| Medication Expenditures Per Person Per Year (\$)             | 3470                                             | 3262 - 3677 <sup>***</sup>    | 3412                                      | 3278 - 3547 <sup>***</sup>    | 3528                           | 3323 - 3734 <sup>***</sup>    |

---

**TOTAL**

---

|                                                      |                  |                     |                    |
|------------------------------------------------------|------------------|---------------------|--------------------|
| Overall Healthcare Expenditures Per Person Year (\$) | 1293 -27 to 2613 | 1688 830 - 2546 *** | 2033 782 - 3284 ** |
|------------------------------------------------------|------------------|---------------------|--------------------|

---

<sup>a</sup> Multivariate model covariate adjusted for age, race, gender, basis of Medicaid eligibility, presence of a copayment for antipsychotic treatment, Medicaid provider capitation, Medicaid Mental Health Substance Abuse coverage, patient use of a psychiatrist, psychotherapy use, Charlson Comorbidity Index, and specific antipsychotic medication initiated.

<sup>b</sup> Among users

<sup>c</sup> Among those admitted

Note: \*\*\*p<0.001, \*\*p<0.01, \*p<0.05

The sample includes pooled annual cross-sections of Medicaid patients (2004-2008) who have schizophrenia. Patients contribute to the analysis only during years that they have a schizophrenia diagnosis coded and at least one prescription claim for an antipsychotic and qualify for at least one cardiometabolic medication cohort.

**Appendix 4:** Two Sensitivity Analyses of Expenditures Shown in Table 3

| Expenditure Differences (\$)                          | <b>Antipsychotic Adherence</b>              |                              |                            |                              |                              |                               |
|-------------------------------------------------------|---------------------------------------------|------------------------------|----------------------------|------------------------------|------------------------------|-------------------------------|
|                                                       | Antipsychotic Adherent                      |                              | Antipsychotic Non-Adherent |                              | Antipsychotic Non-Adherent   |                               |
|                                                       | <b>Cardiomatabolic Medication Adherence</b> |                              |                            |                              |                              |                               |
|                                                       | Cardiomatabolic Non-Adherent                |                              | Cardiomatabolic Adherent   |                              | Cardiomatabolic Non-Adherent |                               |
|                                                       | Value                                       | 95% CI                       | Value                      | 95% CI                       | Value                        | 95% CI                        |
| <b>EMERGENCY ROOM (ER)</b>                            |                                             |                              |                            |                              |                              |                               |
| ER Expenditures (Full Model - Table 3) <sup>a</sup>   | 303                                         | 212 - 395 <sup>***</sup>     | 382                        | 261 - 503 <sup>***</sup>     | 668                          | 578 - 757 <sup>***</sup>      |
| ER Expenditures (Sensitivity Analysis 1) <sup>a</sup> | 272                                         | 170 - 374 <sup>***</sup>     | 391                        | 258 - 524 <sup>***</sup>     | 716                          | 608 - 825 <sup>***</sup>      |
| ER Expenditures (Sensitivity Analysis 2) <sup>a</sup> | 282                                         | 179 - 385 <sup>***</sup>     | 392                        | 259 - 524 <sup>***</sup>     | 717                          | 609 - 825 <sup>***</sup>      |
| <b>OUTPATIENT (OP)</b>                                |                                             |                              |                            |                              |                              |                               |
| OP Expenditures (Full Model - Table 3)                | -1134                                       | -1400 to -869 <sup>***</sup> | -975                       | -1390 to -560 <sup>***</sup> | -2749                        | -3042 to -2457 <sup>***</sup> |
| OP Expenditures (Sensitivity Analysis 1)              | -1119                                       | -1500 to -738 <sup>***</sup> | -1371                      | -1806 to -936 <sup>***</sup> | -3038                        | -3443 to -2633 <sup>***</sup> |
| OP Expenditures (Sensitivity Analysis 2)              | -996                                        | -1380 to -612 <sup>***</sup> | -1294                      | -1730 to -859 <sup>***</sup> | -2991                        | -3397 to -2586 <sup>***</sup> |
| <b>INPATIENT (IP)</b>                                 |                                             |                              |                            |                              |                              |                               |
| IP Expenditures (Full Model - Table 3) <sup>b</sup>   | 1958                                        | 275 - 3640 <sup>*</sup>      | 2414                       | 439 - 4389 <sup>*</sup>      | 5857                         | 4187 - 7526 <sup>***</sup>    |



|                                                       |                                  |                                     |                                     |
|-------------------------------------------------------|----------------------------------|-------------------------------------|-------------------------------------|
| IP Expenditures (Sensitivity Analysis 1) <sup>b</sup> | 535 -1309 to 2379                | 1919 -244 - 4082                    | 5812 3739 - 7884 <sup>***</sup>     |
| IP Expenditures (Sensitivity Analysis 2) <sup>b</sup> | 863 -1112 to 2837                | 2289 66 - 4513 <sup>*</sup>         | 5952 3811 - 8093 <sup>***</sup>     |
| <b>MEDICATION (Rx)</b>                                |                                  |                                     |                                     |
| Rx Expenditures (Full Model - Table 3)                | -256 -387 to -124 <sup>***</sup> | -1651 -1794 to -1508 <sup>***</sup> | -3099 -3225 to -2972 <sup>***</sup> |
| Rx Expenditures (Sensitivity Analysis 1)              | -230 -403 to -57 <sup>***</sup>  | -1706 -1893 to -1519 <sup>***</sup> | -3347 -3515 to -3178 <sup>***</sup> |
| Rx Expenditures (Sensitivity Analysis 2)              | -196 -367 to -24 <sup>*</sup>    | -1685 -1873 to -1498 <sup>***</sup> | -3284 -3454 to -3114 <sup>***</sup> |
| <b>TOTAL</b>                                          |                                  |                                     |                                     |
| Total Expenditures (Full Model - Table 3)             | 359 -451 to 1169                 | -1467 -2472 to -463 <sup>***</sup>  | -1128 -2020 to -236 <sup>*</sup>    |
| Total Expenditures (Sensitivity Analysis 1)           | -738 -1728 to 252                | -2081 -3255 to -906 <sup>***</sup>  | -1380 -2632 to -129 <sup>*</sup>    |
| Total Expenditures (Sensitivity Analysis 2)           | -138 -1211 to 936                | -1839 -3032 to -647 <sup>**</sup>   | -970 -2260 to 320                   |

<sup>a</sup> Among users <sup>b</sup> Among those admitted

Note: \*\*\*p<0.001, \*\*p<0.01, \*p<0.05. Expenditures are reported as per person per year. Reference group is adherent to antipsychotics and cardiometabolic medications. The first row within each expenditure category reflects the values from Table 3 from the full model. The second row within each category (sensitivity analysis 1) reflects sensitivity analysis restricting the sample by excluding patients in capitated plans and those without Medicaid Mental Health Substance Abuse coverage. The third row within each category (sensitivity analysis 2) further restricts the model from sensitivity analysis 1 by excluding the indicators for cardiometabolic condition counts and the psychiatrist and psychotherapy use variables.
